# Supplementary material for: New selective thiolate gold(i) complexes inhibit the proliferation of different human cancer cells and induce apoptosis in primary cultures of mouse colon tumors
Source: Royal Society of Chemistry journal article supplement (doi:10.1039/c9dt04423j), 2020-01-01
Supplement: c9dt04423j1.pdf [file c9dt04423j1.pdf]

# SUPPORTING INFORMATION

**for**

New selective thiolate gold(I) complexes inhibit proliferation of different human cancer cells and induce apoptosis in primary cultures of mouse colon tumors.

*Elisa Abas,<sup>a</sup> Raquel Pena-Martinez,<sup>a</sup> Diego Aguirre-Ramírez,<sup>b</sup> Antonio Rodriguez-Dieguez,<sup>e</sup> Mariano Laguna.\*,<sup>a</sup> and Laura Grasa,\*<sup>b,c,d</sup>*

<sup>a</sup> Instituto de Síntesis Química y Catálisis Homogénea, Universidad de Zaragoza-CSIC, Plaza S. Francisco s/n, 50009, Zaragoza, Spain.

<sup>b</sup> Dpto. Farmacología y Fisiología, Facultad de Veterinaria, Universidad de Zaragoza, Miguel Servet, 177, 50013, Zaragoza, Spain.

<sup>c</sup> Instituto de Investigación Sanitaria de Aragón (IIS Aragón), 50013, Zaragoza, Spain.

<sup>d</sup> Instituto Agroalimentario de Aragón -IA2- (Universidad de Zaragoza-CITA), 50009, Zaragoza, Spain.

<sup>e</sup> Dpto. de Química Inorgánica, Facultad de Química, Universidad de Granada, Severo Ochoa s/n, 18071, Granada, Spain.

## Table of Contents

**Figure S1.** Infrared spectrum of complex **1**.

**Table S1.** Details of data collection and structure refinement for complexes **4**, **5** and **8**.

**Figure S2.** Stacking interactions between aromatic rings of complex **4**.

**Figure S3.** Hydrogen bond interactions between N6-O3 y N11-O2 atoms, presents in complex **8**.

**Figure S4.** Angle of  $82.28^\circ$  between the plane containing the benzene ring and the defined plane for nitrogen atoms pertaining to the HMPT ligand.

**Figure S5.** Angle of  $60.35^\circ$  between the plane containing the benzene ring and the defined plane for nitrogen atoms pertaining to the HMPT ligand.

**Figure S6.** UV-Vis spectra of **1-8** complexes recorded in PBS and *n*-octanol at  $37^\circ\text{C}$ .

**Figure S7.** UV-Vis spectra of **1-8** complexes recorded at different times for 24 h in PBS at  $37^\circ\text{C}$ .

**Figure S8.** Fluorescence emission spectra of BSA at 298 K in the presence of increasing amounts of the gold(I) complexes.

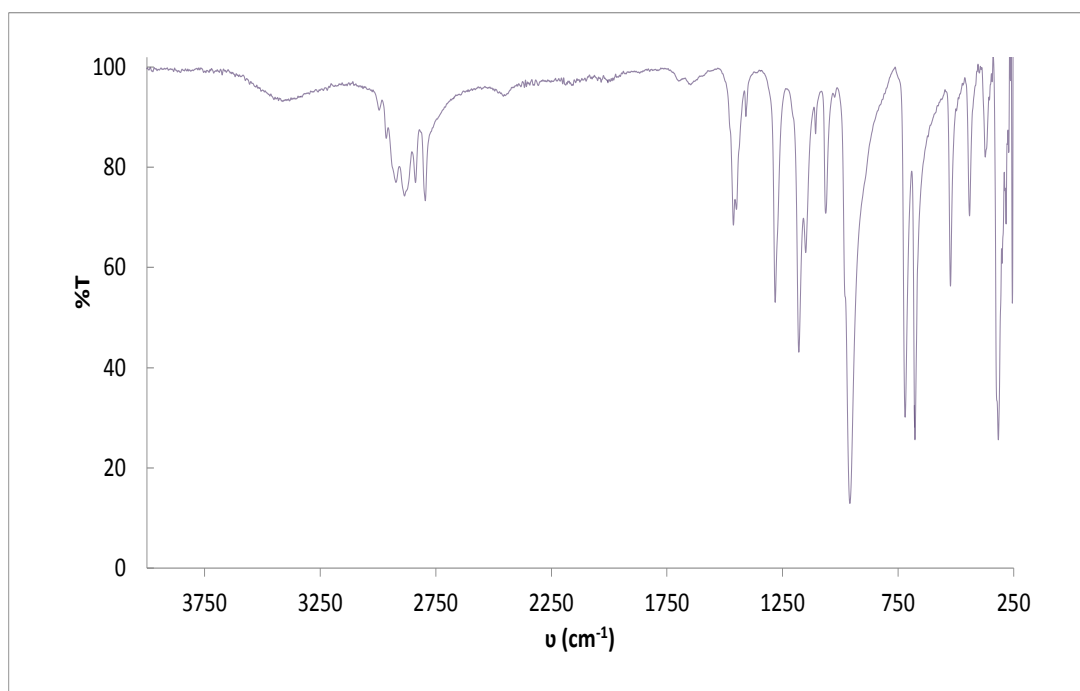

**Figure S1.** Infrared spectrum of complex 1.

**Table S1.** Details of data collection and structure refinement for complexes **4**, **5** and **8**.

|                                              | <b>Complex 4</b>                                    | <b>Complex 5</b>                                                                              | <b>Complex 8</b>                                     |
|----------------------------------------------|-----------------------------------------------------|-----------------------------------------------------------------------------------------------|------------------------------------------------------|
| <i>Chemical Formula</i>                      | C <sub>12</sub> H <sub>25</sub> AuN <sub>3</sub> PS | C <sub>52</sub> H <sub>88</sub> Au <sub>4</sub> N <sub>16</sub> P <sub>4</sub> S <sub>8</sub> | C <sub>10</sub> H <sub>21</sub> AuN <sub>5</sub> OPS |
| <i>CCDC number</i>                           | 1938214                                             | 1938215                                                                                       | <i>Supp. Information</i>                             |
| <i>Molecular Weight</i>                      | 499.36                                              | 2105.60                                                                                       | 487.31                                               |
| <i>Temperature (K)</i>                       | 293(2)                                              | 293(2)                                                                                        | 293(2)                                               |
| <i>Crystal system, Cspace group</i>          | Triclinic, P -1                                     | Monoclinic, P 21/c                                                                            | Monoclinic, P 21/c                                   |
| <b>Cell unit dimensions</b>                  |                                                     |                                                                                               |                                                      |
| <i>a(Å)</i>                                  | 7.9330(4)                                           | 7.7454(2)                                                                                     | 16.0623(9)                                           |
| <i>b(Å)</i>                                  | 9.2516(4)                                           | 13.1136(3)                                                                                    | 21.3110(10)                                          |
| <i>c(Å)</i>                                  | 13.6133(8)                                          | 18.2077(5)                                                                                    | 19.9610(13)                                          |
| <i>α (°)</i>                                 | 72.501(5)                                           | 90                                                                                            | 90                                                   |
| <i>β (°)</i>                                 | 80.034(4)                                           | 107.215(2)                                                                                    | 103.728(6)                                           |
| <i>γ (°)</i>                                 | 68.630(4)                                           | 90                                                                                            | 90                                                   |
| <i>Volumen</i>                               | 885.10(9)                                           | 1766.51(8)                                                                                    | 6637.5(7)                                            |
| <i>Z</i>                                     | 2                                                   | 1                                                                                             | 16                                                   |
| <i>Calculated density (g/cm<sup>3</sup>)</i> | 1.874                                               | 1.979                                                                                         | 1.951                                                |
| <i>F(000)</i>                                | 484                                                 | 1016                                                                                          | 3744                                                 |
| <i>Collected/unique reflexions</i>           | 13818                                               | 13769                                                                                         | 51002                                                |
| <i>Data/retrains/parametres</i>              | 3792/0/182                                          | 3703/0/196                                                                                    | 14143/102/685                                        |
| <i>F<sup>2</sup></i>                         | 1.040                                               | 1.094                                                                                         | 0.999                                                |
| <i>Final R values</i>                        | R <sub>1</sub> 0.0336 wR <sub>2</sub><br>0.0653     | R <sub>1</sub> 0.0268 wR <sub>2</sub><br>0.0569                                               | R <sub>1</sub> 0.0912 wR <sub>2</sub><br>0.1221      |
| <i>R all data</i>                            | R <sub>1</sub> 0.0428 wR <sub>2</sub><br>0.0697     | R <sub>1</sub> 0.0308 wR <sub>2</sub><br>0.0588                                               | R <sub>1</sub> 0.2587 wR <sub>2</sub><br>0.1795      |

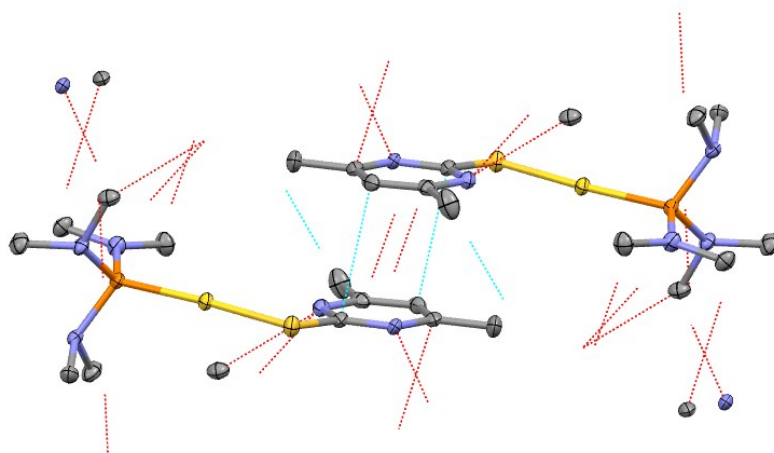

**Figure S2.** Stacking interactions between aromatic rings of complex **4**.

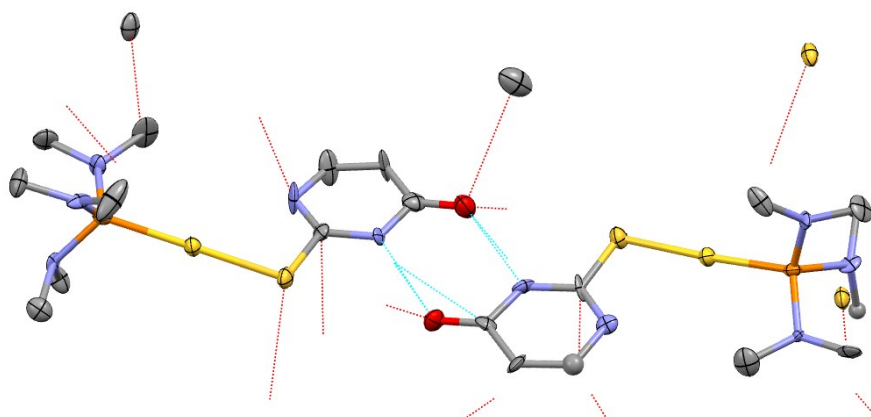

**Figure S3.** Hydrogen bond interactions between N6-O3 y N11-O2 atoms, presents in complex **8**.

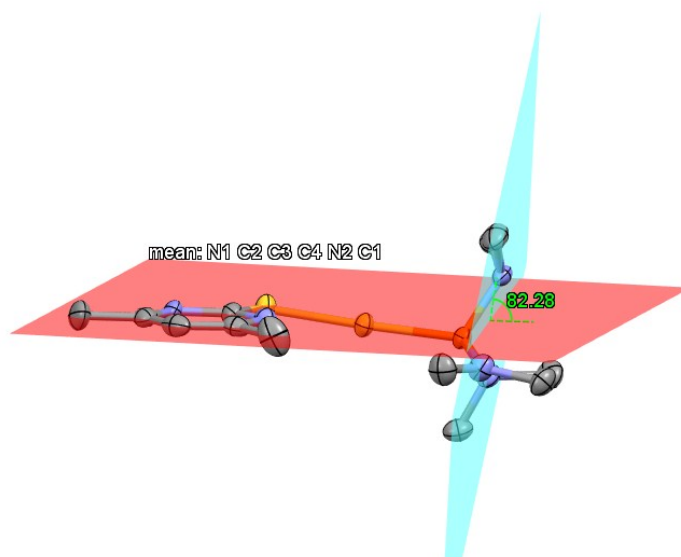

**Figure S4.** Angle of  $82.28^\circ$  between the plane containing the benzene ring and the defined plane for nitrogen atoms pertaining to the HMPT ligand.

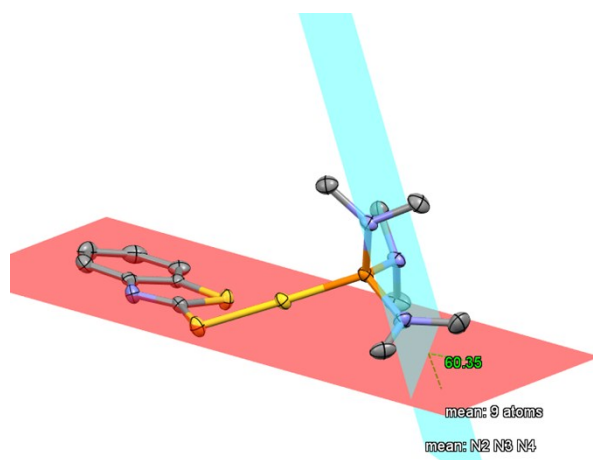

**Figure S5.** Angle of  $60.35^\circ$  between the plane containing the benzene ring and the defined plane for nitrogen atoms pertaining to the HMPT ligand.

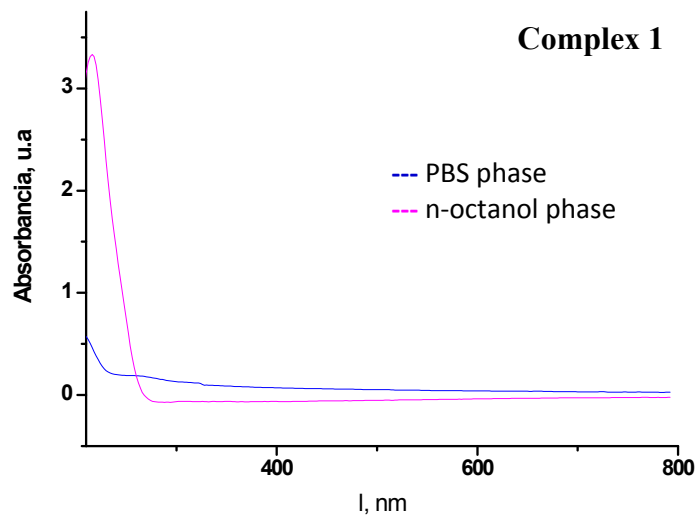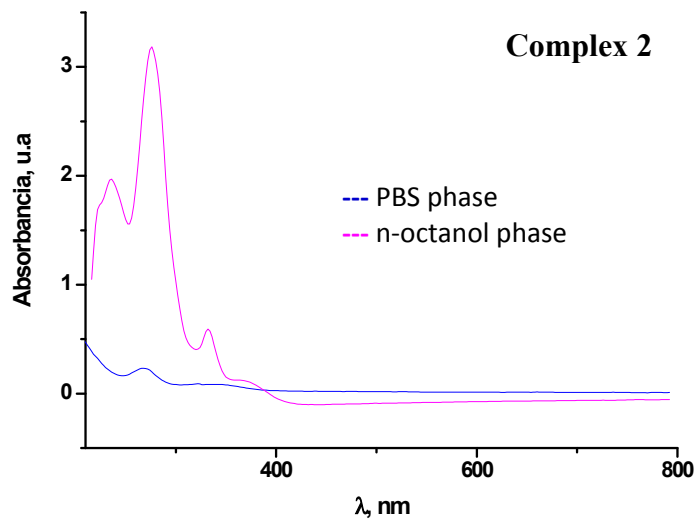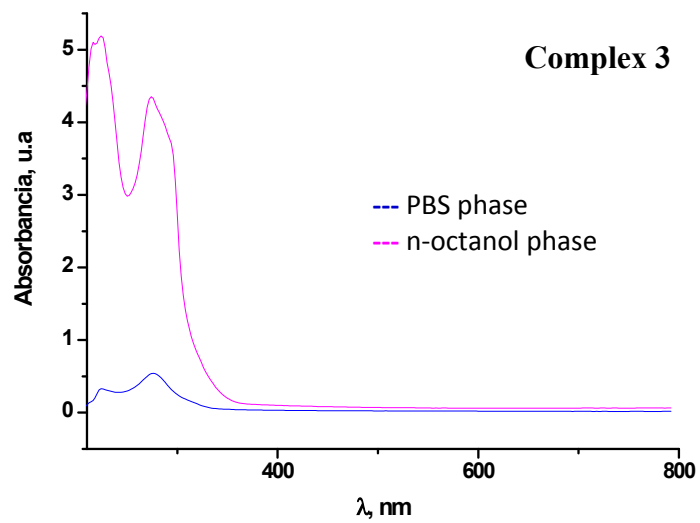

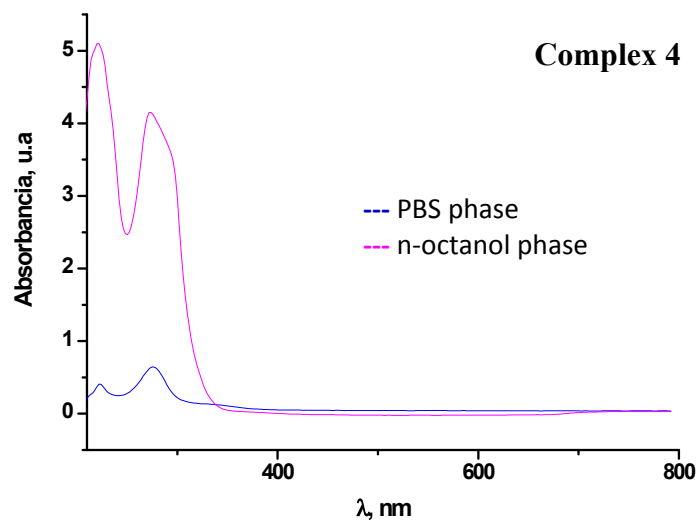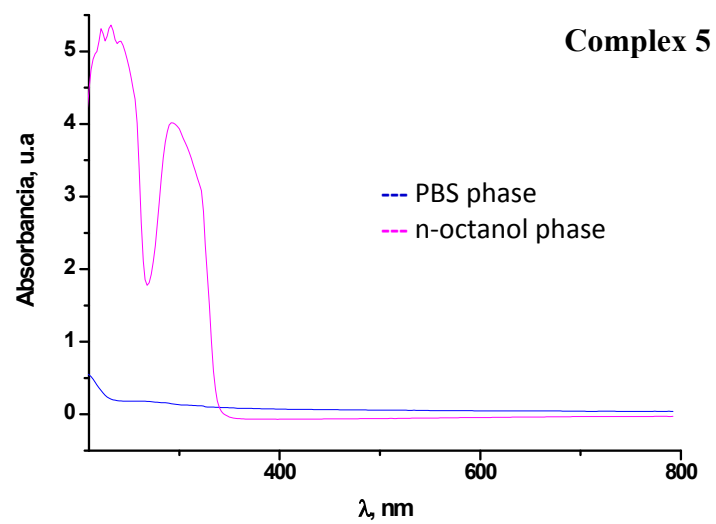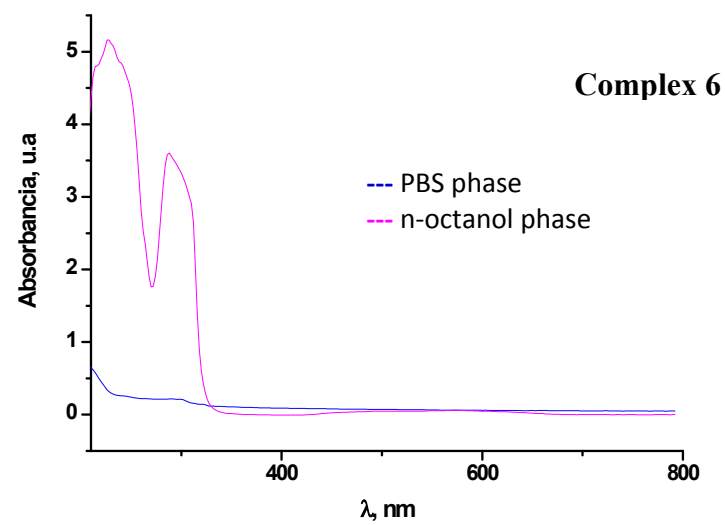



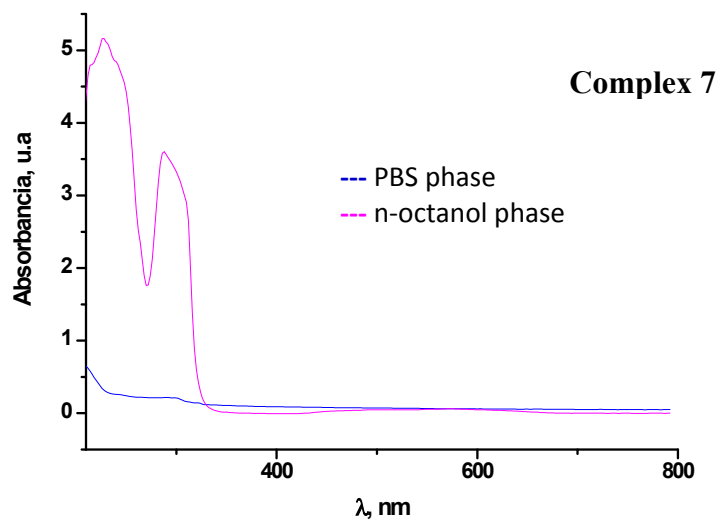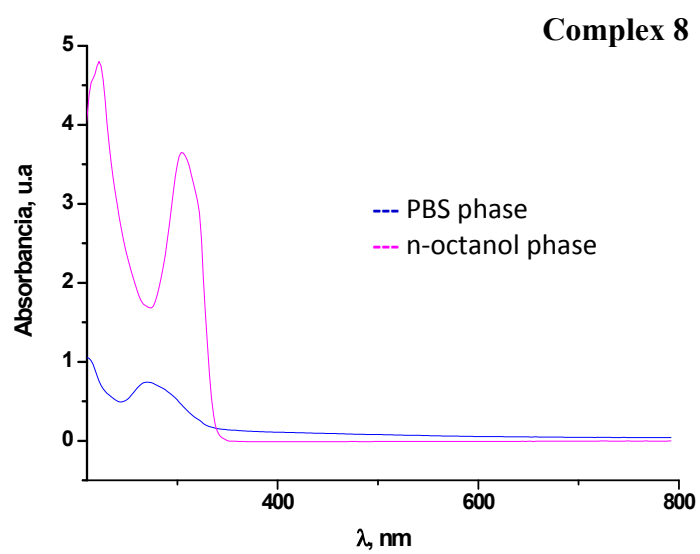

**Figure S6.** UV-Vis spectra of **1-8** complexes recorded in PBS and n-octanol at 37°C.

### Complex 1

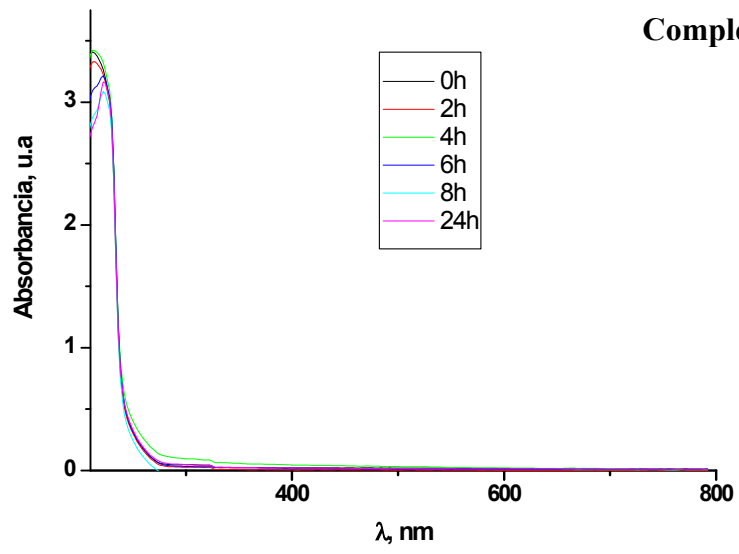

### Complex 2

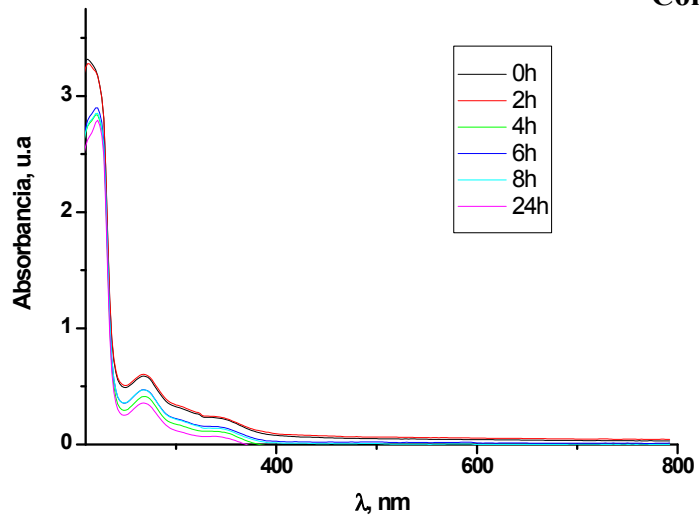

### Complex 3

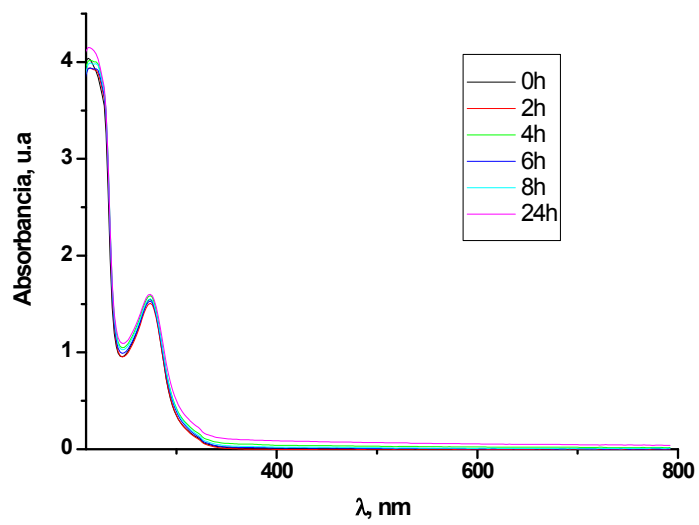

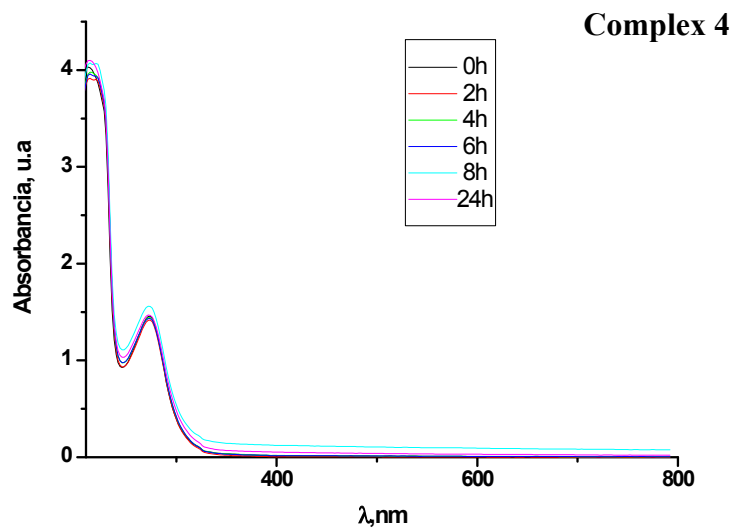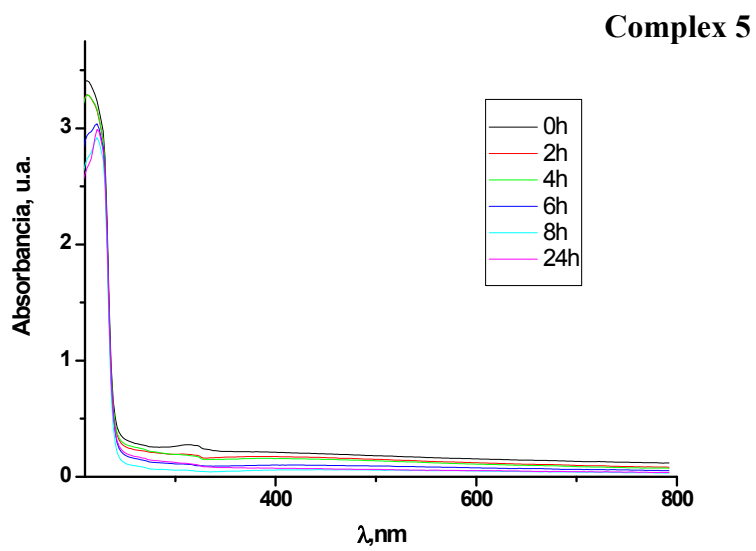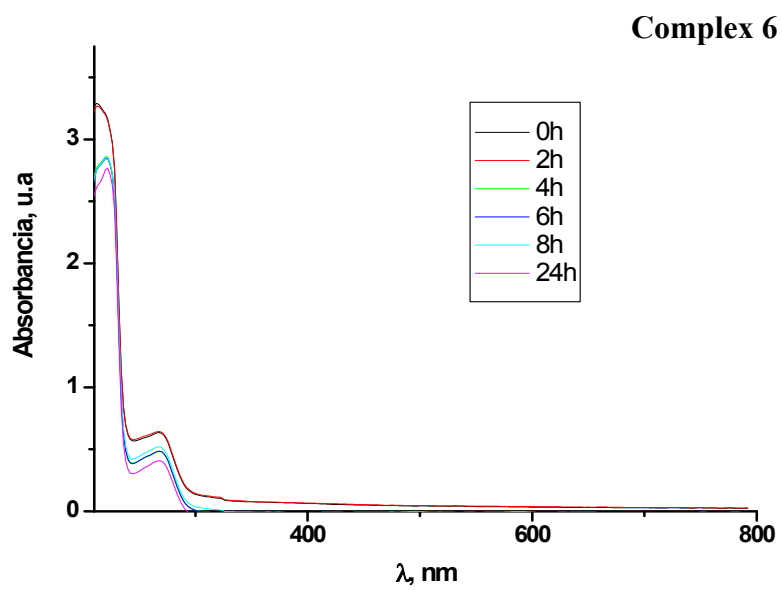

### Complex 7

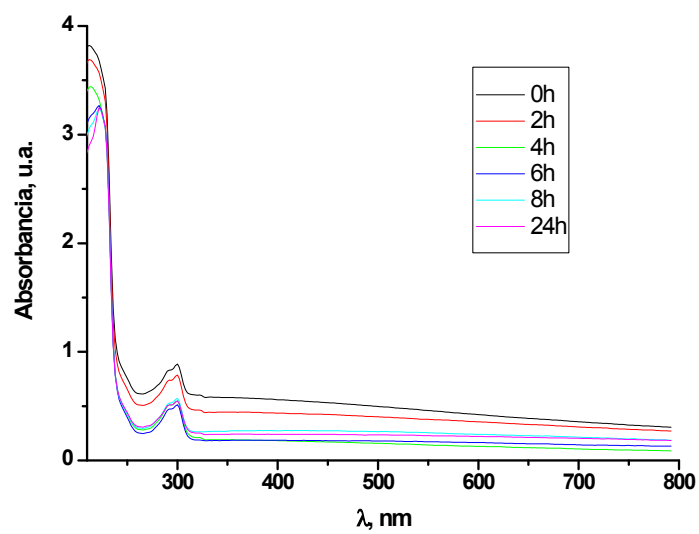

### Complex 8

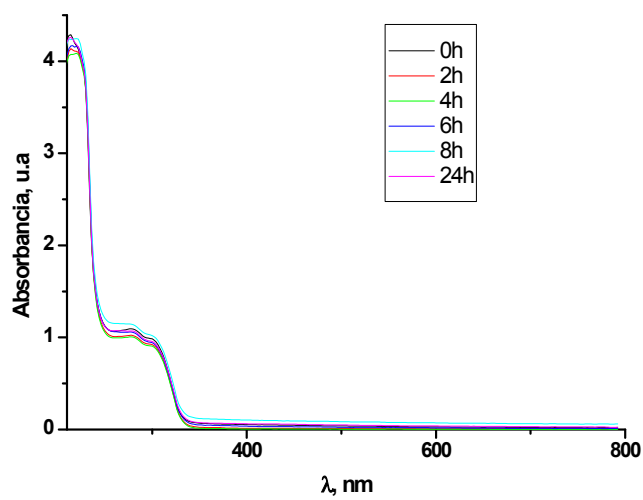

**Figure S7.** UV-Vis spectra of **1-8** complexes recorded at different times for 24 h in PBS at 37°C.

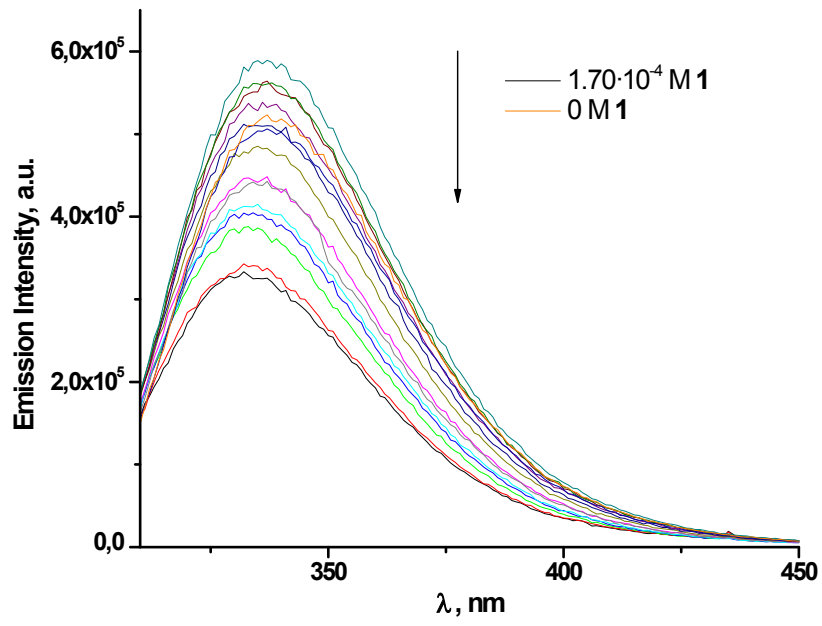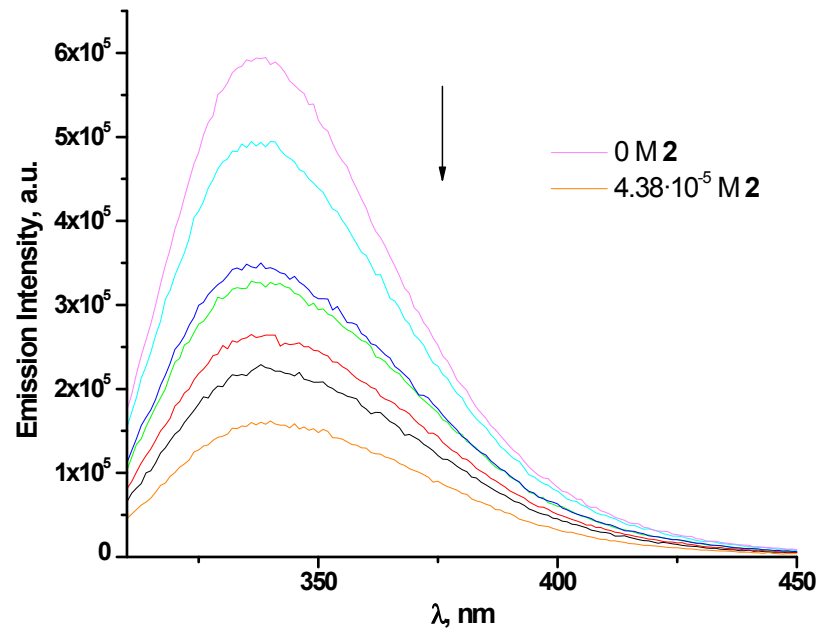

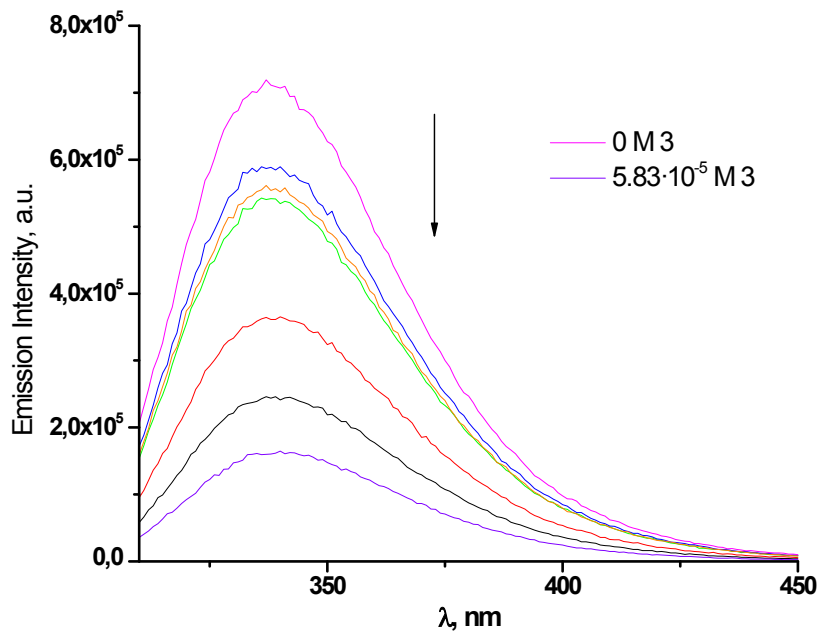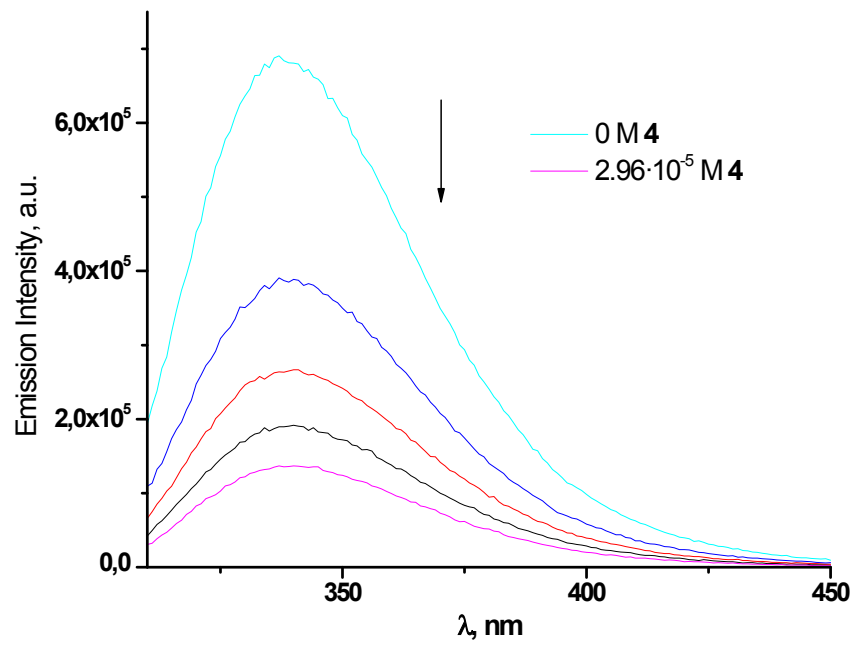

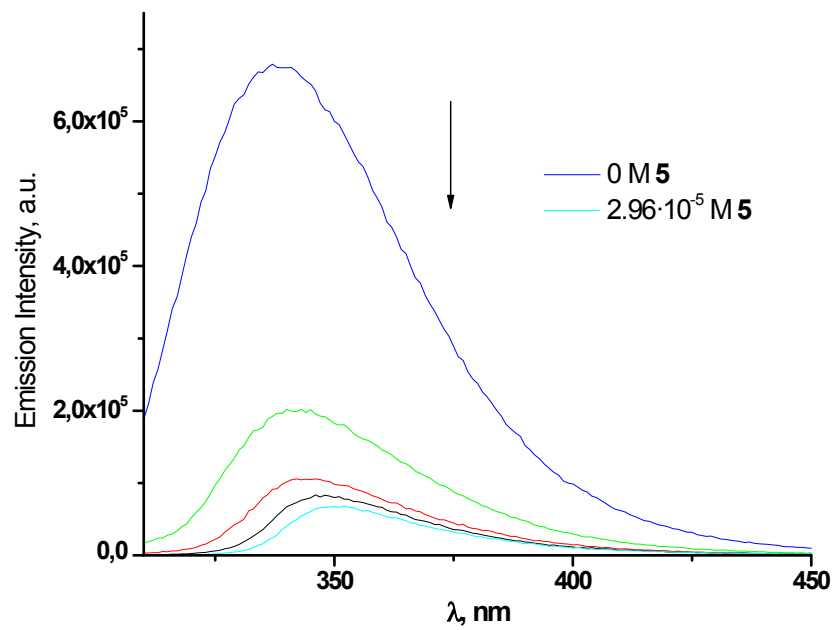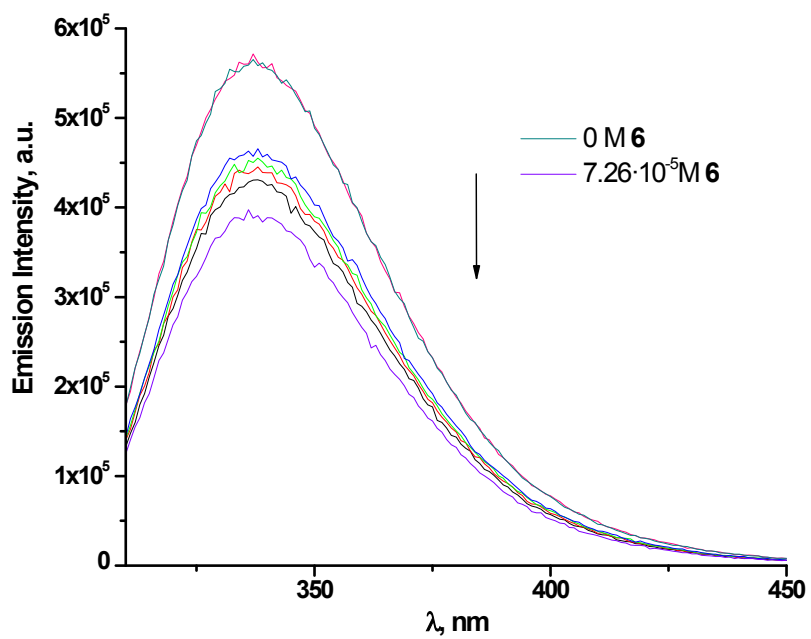

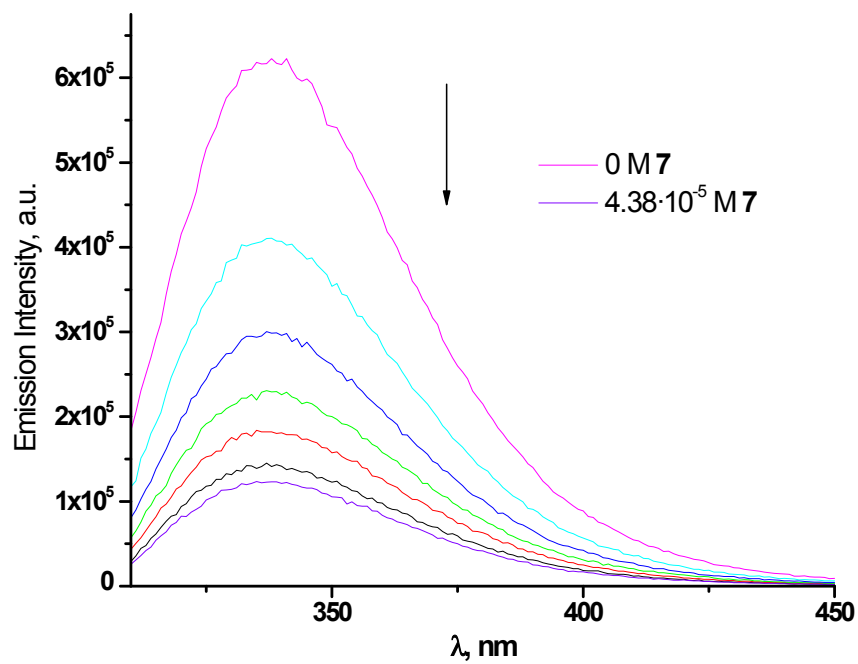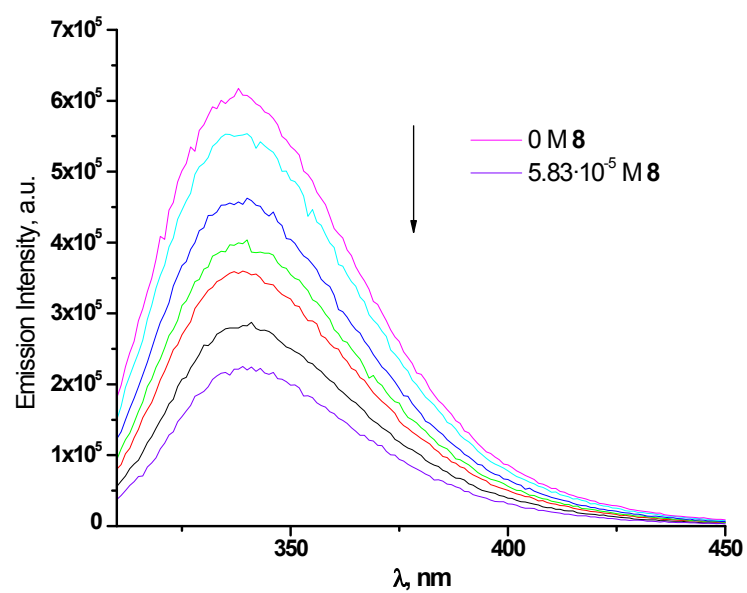

**Figure S8.** Fluorescence emission spectra of BSA at 298 K in the presence of increasing amounts of the gold(I) complexes.
